# Supplementary material for: Replisome bypass of a protein-based R-loop block by Pif1
Source: PubMed Central journal article supplement (PMC7720201; doi:10.1073/pnas.2020189117), 2020-11-16
Supplement: pnas.2020189117.sapp.pdf [file pnas.2020189117.sapp.pdf]

## Supplementary Information for

### Replisome bypass of a protein-based R-loop block by Pif1

Grant D. Schauer<sup>a,1,\*</sup>, Lianne M. Spengelink<sup>b,c,1</sup>, Jacob S. Lewis<sup>b,c,e</sup>, Olga Yurieva<sup>d</sup>, Stefan H. Mueller<sup>b,c</sup>, Antoine M. van Oijen<sup>b,c,\*</sup> and Michael E. O'Donnell<sup>d\*</sup>

\*Correspondence should be addressed to:

Grant D. Schauer, grant.schauer@colostate.edu

Antoine M. van Oijen, Email: vanoijen@uow.edu.au

Michael E. O'Donnell, Email: odonnel@rockefeller.edu

#### **This PDF file includes:**

Figures S1 to S4

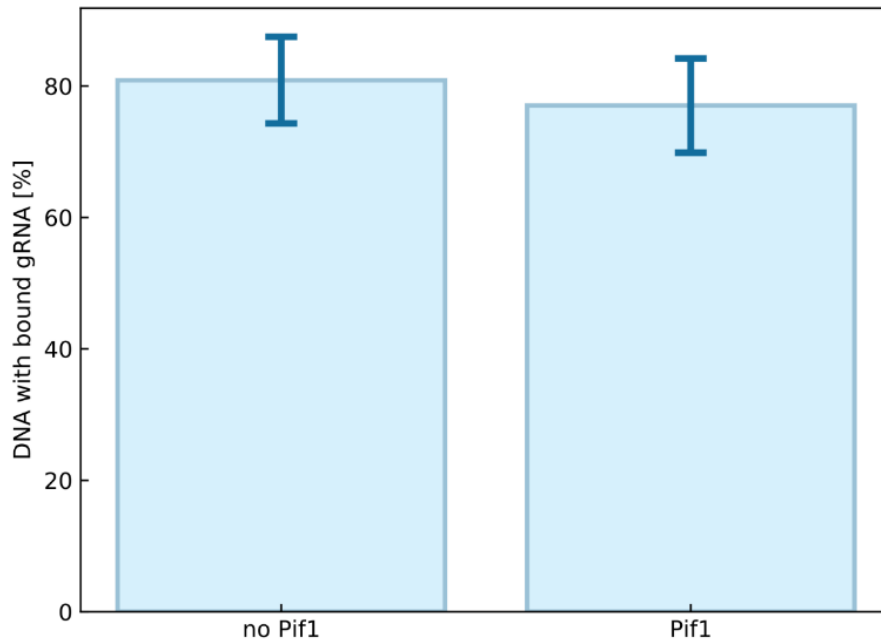

**Fig. S1. Pif1 does not displace roadblocks in absence of the replisome.** Results are from single-molecule replication studies (see Methods). The amount of DNA molecules with bound dCas9-gRNA was observed before addition of Pif1 and after 30 min of incubation with 80 nM Pif1. Over 4 individual movies the amount of bound dCas9-gRNA stayed constant within uncertainty levels.  $(80.9 \pm 6.6)\%$  in absence,  $(77.0 \pm 7.2)\%$  in presence of Pif1.

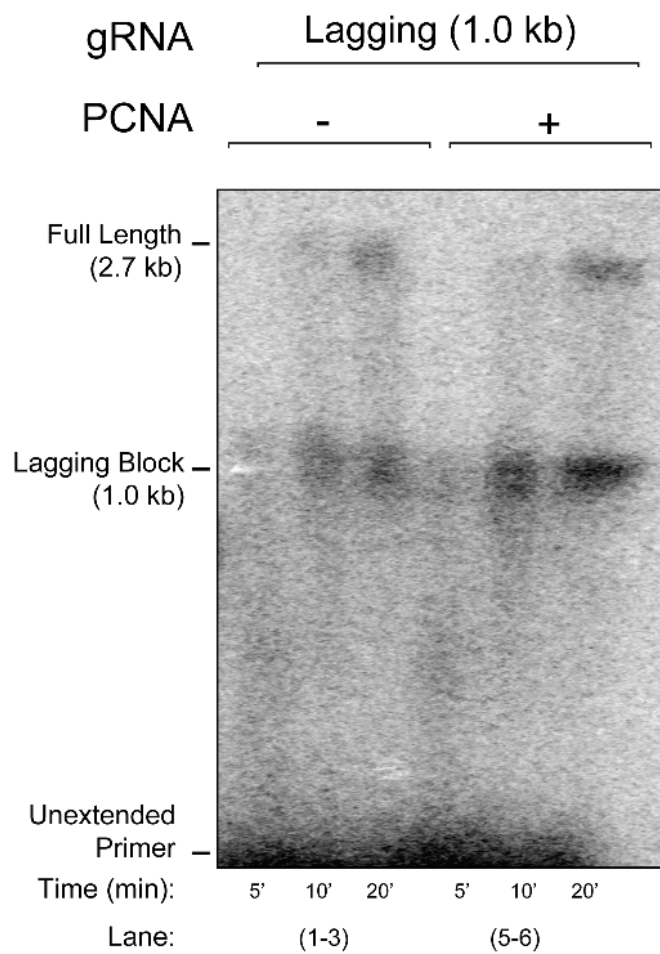

**Fig. S2. PCNA is not required for Pif1 mediated bypass of a lagging strand dCas9 block.** Alkaline agarose gel of the indicated replication products in the presence of a lagging strand block.

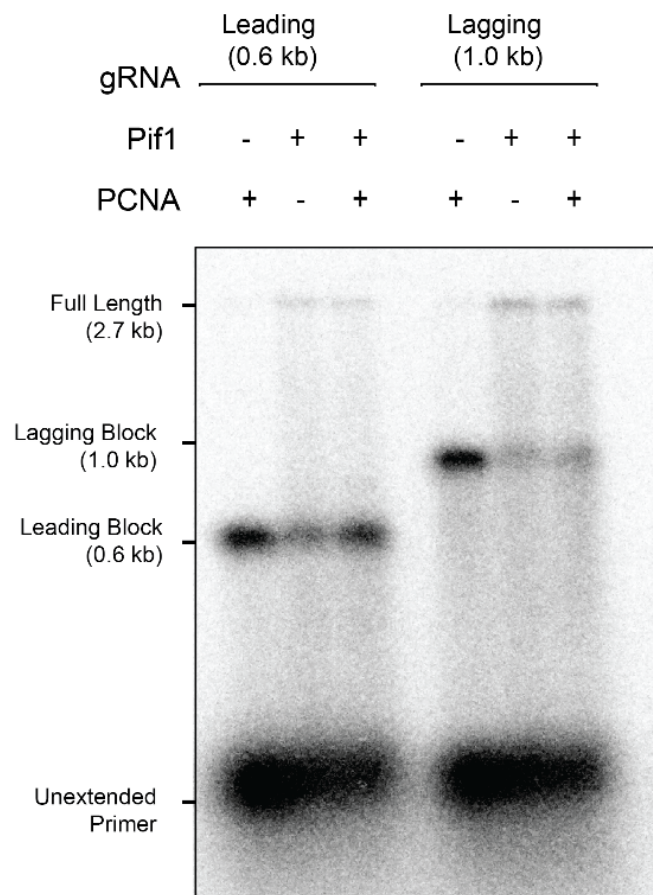

**Fig. S3. PCNA does not enhance bypass in the presence of the MTC complex and Mcmc10.** Replication products in the presence of the indicated block and the presence or absence of Pif1 and/or PCNA is shown. MTC and Mcm10 were present in all reactions.

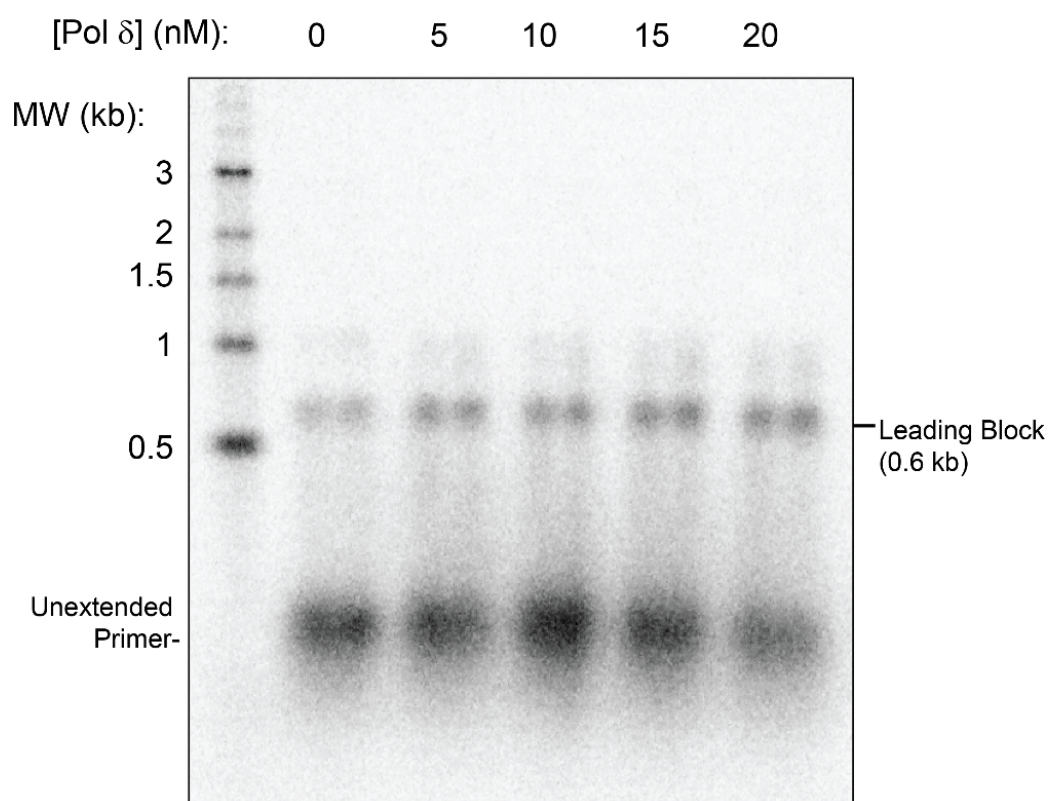

**Fig. S4. Addition of Pol delta-PCNA and Pol delta does not permit displacement of the dCas9 R-loop block.** Replication products in the presence of the leading strand dCas9 R-loop block at 0.6 kb are shown. In addition to CMG, Pol delta, RFC, PCNA, Mcm10, and MTC, Pol  $\delta$  were present at 20 nM, and Pol delta was added at the indicated concentrations.
